# Supplementary material
Source: PubMed Central journal article supplement (PMC8975842)
Supplement: 41422_2022_617_MOESM1_ESM.pdf [file 41422_2022_617_MOESM1_ESM.pdf]

1 **Supplementary Material**

2 **Peptide-based pan-CoV fusion inhibitors maintain high potency against SARS-**  
3 **CoV-2 Omicron variant**

4 Shuai Xia<sup>1\*</sup>, Jasper Fuk-Woo Chan<sup>2,3,4\*</sup>, Lijue Wang<sup>1\*</sup>, Fanke Jiao<sup>1</sup>, Kenn Ka-Heng  
5 Chik<sup>4</sup>, Hin Chu<sup>2,3,4</sup>, Qiaoshuai Lan<sup>1</sup>, Wei Xu<sup>1</sup>, Qian Wang<sup>1</sup>, Chao Wang<sup>5</sup>,  
6 Kwok-Yung Yuen<sup>2,3,4†</sup>, Lu Lu<sup>1†</sup>, Shibo Jiang<sup>1†</sup>

7  
8 **Affiliations:**

9 <sup>1</sup>Key Laboratory of Medical Molecular Virology (MOE/NHC/CAMS), School of Basic  
10 Medical Sciences, Shanghai Frontiers Science Center of Pathogenic Microbes and  
11 Infection, Shanghai Institute of Infectious Disease and Biosecurity, Fudan University,  
12 Shanghai, China.

13 <sup>2</sup>State Key Laboratory of Emerging Infectious Diseases, Carol Yu Centre for Infection,  
14 Department of Microbiology, Li Ka Shing Faculty of Medicine, The University of Hong  
15 Kong, Pokfulam, Hong Kong Special Administrative Region, China.

16 <sup>3</sup>Department of Clinical Microbiology and Infection Control, The University of Hong  
17 Kong-Shenzhen Hospital, Shenzhen, Guangdong, China.

18 <sup>4</sup>Centre for Virology, Vaccinology and Therapeutics, Hong Kong Science and  
19 Technology Park, Hong Kong Special Administrative Region, China.

20 <sup>5</sup>State Key Laboratory of Toxicology and Medical Countermeasures, Beijing Institute  
21 of Pharmacology and Toxicology, Beijing, China.

22 \*These authors contributed equally to this work.

23 †Corresponding author. Email: shibojiang@fudan.edu.cn (S.J.); lul@fudan.edu.cn  
24 (L.L.); kyyuen@hku.hk (K.-Y.Y.)

25

26 **Methods:**

27 **Cells and plasmids**

28 The 293T cells were purchased from ATCC (USA); the Calu-3 cell line and the  
29 Caco2 cell line were obtained from the Chinese Academy of Science Cell Bank (China);  
30 293T/ACE2 and VeroE6-TMPRSS2 cells were maintained in our laboratories. All cell  
31 lines were cultured in Dulbecco's Modified Eagle's Medium (DMEM) with 10% fetal  
32 bovine serum (FBS). Plasmids were synthesized or stored in our laboratories, including  
33 pAAV-SARS-CoV-2-S (Omicron/Delta/D614G)-IRES-EGFP, pcDNA-3.1-SARS-  
34 CoV-2-S (Omicron/Delta/D614G), pNL4-3.Luc.R-E and pAAV-IRES-EGFP.

35

36 **S protein-mediated cell-cell fusion and inhibition assays**

37 Effector cells (293T/S/EGFP) co-expressed S protein and EGFP through  
38 transfecting plasmid pAAV-IRES-S-EGFP. Calu-3 or Caco2 cells naturally express  
39 human ACE2 receptor on their surface or 293T/ACE2 cells were used as target cells,  
40 while 293T cells transfected with plasmid pAAV-IRES-EGFP (293T/EGFP) were used  
41 as negative control. Effector cells (293T/S/EGFP) were collected and added to target  
42 cells for co-incubation for 24 hrs at 37 °C, and then pictures were taken under the  
43 fluorescence microscope. The inhibitory activity of peptides tested on S-mediated cell-  
44 cell fusion was determined as previously described<sup>1</sup>. Briefly, effector cells (293  
45 T/S/EGFP) and target cells were cocultured in the presence or absence of a test peptide.  
46 The percentage of cell-cell fusion was recorded, and the inhibition percentage of cell-  
47 cell fusion was calculated using the following formula as described elsewhere<sup>2</sup>:  $[1 -$   
48  $(E - N)/(P - N)] \times 100\%$ , where "E" represents the percentage of cell-cell fusion in the  
49 experimental group, "P" represents the percentage of cell-cell fusion in the positive  
50 control group, and "N" represents the percentage of cell-cell fusion in the negative  
51 control group. The IC<sub>50</sub> was calculated using GraphPad Prism 8.0.

52

53 **Pseudovirus (PsV) infection and inhibition assays**

54 PsVs were produced by co-transfecting plasmids carrying D614G/Delta/Omicron  
55 mutant SARS-CoV-2 S protein with pNL4-3.Luc.R-E-. Then pseudovirus  
56 supernatant was collected 60 hrs post-transfection. The inhibitory activity of peptides  
57 against SARS-CoV-2 PsV was tested on Caco2 cells using a modified standard  
58 neutralization assay<sup>3</sup>. Briefly, a serially four-fold diluted peptide (60 µl) was  
59 incubated with PsV (50 µl) for ~30 min at 37°C. Then the mixture was transferred  
60 into Caco2 cells in a 96-well plate. After 12 hrs, culture medium was refreshed. After  
61 an additional 48 hrs, luciferase activity was tested by the Luciferase Assay System  
62 (Promega, Madison, WI, USA).

63

64 **Authentic SARS-CoV-2 Omicron variant inhibition assay**

65 Omicron variant (hCoV-19/Hong Kong/HKU-344/2021; GISAID accession number  
66 EPI\_ISL\_7357684) was isolated from patients in Hong Kong as previously describe  
67 ed<sup>4</sup>. To measure the inhibitory activity of peptides tested on authentic SARS-CoV-2  
68 infection, Vero-E6-TMPRSS2 cells were first seeded in a 96 well-plate in cell culture  
69 medium (DMEM + 10% FBS + 1% penicillin/streptomycin) overnight at 37 °C under  
70 5% CO<sub>2</sub> to establish a monolayer. The following day, peptide inhibitors were diluted  
71 into indicated concentrations, in wells of a 96 well-plate in triplicate in DMEM + 2%  
72 FBS and then incubated with 0.01 MOI of SARS-CoV-2 Omicron, at 37 °C for 1 h.  
73 Afterwards, the mixture was overlaid onto cells and further incubated at 37 °C under  
74 5% CO<sub>2</sub> for approximately 48 h. Cytopathic effect (CPE) was then visually assessed  
75 in all wells and scored as either negative (100% inhibition) or positive (0% inhibition)  
76 for CPE induced by viral replication in a blinded manner as previously described<sup>4</sup>.

77

78 **Conformational analysis of S protein**

79 The structures of SARS-CoV-2 spikes in pre-fusion state (PDB entry: 6XR8) and post-  
80 fusion state (PDB entry: 6XRA) were visualized and analyzed using UCSF ChimeraX<sup>5</sup>.

81 The complex structure of SARS-CoV-2 spike HR1 domain and EK1 peptide (PDB entry:  
82 7C53) ) were visualized and analyzed using Pymol<sup>6</sup>.

83

84

## 85 REFERENCES

- 86 1. Xia, S., *et al.* Inhibition of SARS-CoV-2 (previously 2019-nCoV) infection by a highly potent pan-  
87 coronavirus fusion inhibitor targeting its spike protein that harbors a high capacity to mediate  
88 membrane fusion. *Cell Res* **30**, 343-355 (2020).
- 89 2. Lu, L., *et al.* Structure-based discovery of Middle East respiratory syndrome coronavirus fusion  
90 inhibitor. *Nat Commun* **5**, 3067 (2014).
- 91 3. Xia, S., *et al.* Structural and functional basis for pan-CoV fusion inhibitors against SARS-CoV-2  
92 and its variants with preclinical evaluation. *Signal Transduct Target Ther* **6**, 288 (2021).
- 93 4. Lu, L., *et al.* Neutralization of SARS-CoV-2 Omicron variant by sera from BNT162b2 or Coronavac  
94 vaccine recipients. *Clin Infect Dis* (2021).
- 95 5. Pettersen, E.F., *et al.* UCSF ChimeraX: Structure visualization for researchers, educators, and  
96 developers. *Protein Sci* **30**, 70-82 (2021).
- 97 6. Schrodinger, LLC. The PyMOL Molecular Graphics System, Version 1.8 Schrödinger, LLC.  
98 (2015).

99

100

101

102

103

104

105

106

107

108

109

110

111

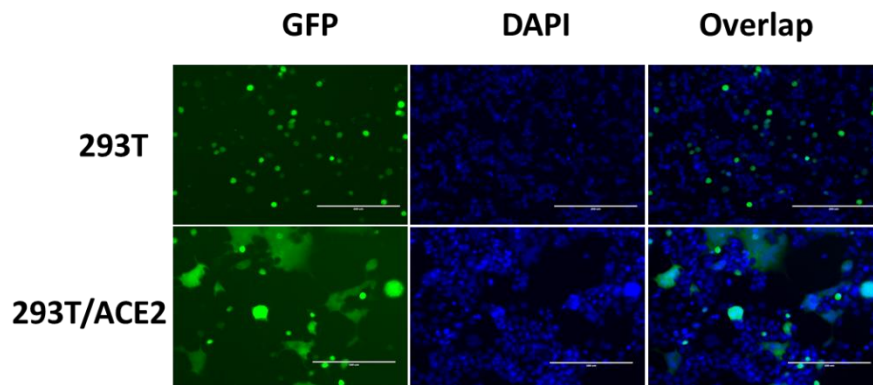

112

113 **Supplementary Fig. S1. Representative images of cell–cell fusion between**  
114 **293T/SARS-CoV-2(Omicron)/EGFP, effector cells and target cells (293T or**  
115 **293T/ACE2) after coculture for 24 hours. Scale bar = 200 μm.**

116

117

118

119

120

121

122

123

124

125

126

127

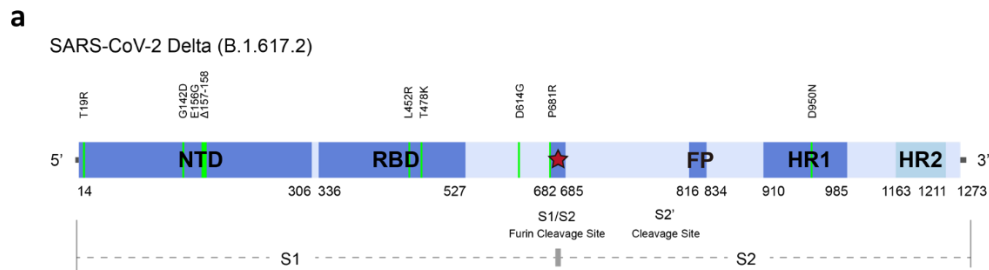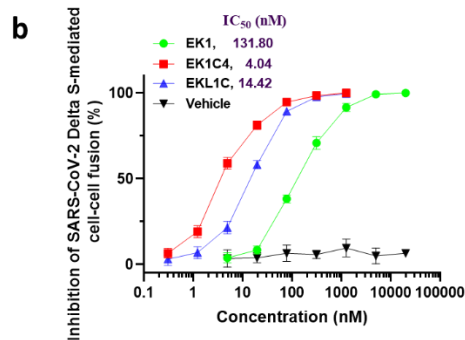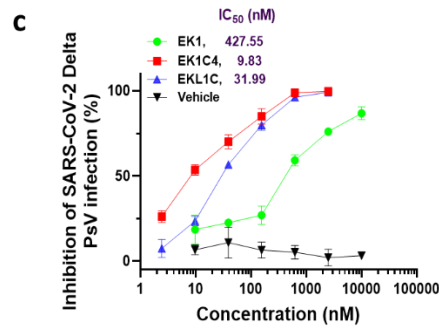

128

129 **Supplementary Fig. S2. Schematic representation of the Delta SARS-CoV-2**  
 130 **variant S protein (a), and potent inhibitory activity of the pan-CoV fusion**  
 131 **inhibitors (EK1, EK1C4 and EKL1C peptides) against Delta S-mediated cell-cell**  
 132 **fusion (b) and pseudovirus infection (c). Samples were tested in triplicate, and the**  
 133 **experiment was performed twice. Data from a representative experiment are presented**  
 134 **in mean±SD.**

135

136

137

138

139

140

141

142

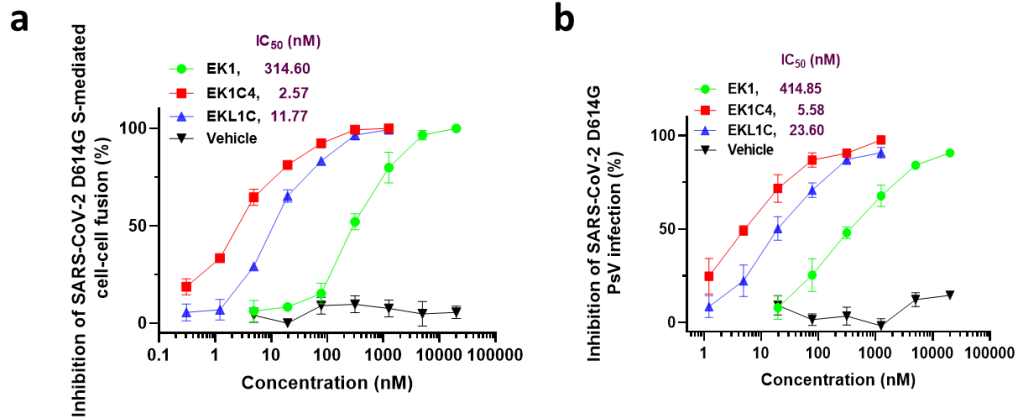

143

144

145 **Supplementary Fig. S3. Potent inhibitory activity of pan-CoV fusion inhibitors**  
 146 **(EK1, EK1C4 and EKL1C peptides) against D614G variant S-mediated cell-cell**  
 147 **fusion (a) and pseudovirus infection (b).** Samples were tested in triplicate, and the  
 148 experiment was performed twice. Data from a representative experiment are presented  
 149 in mean±SD.

150

151

152

153

154

155

156

157

158

159

160

161

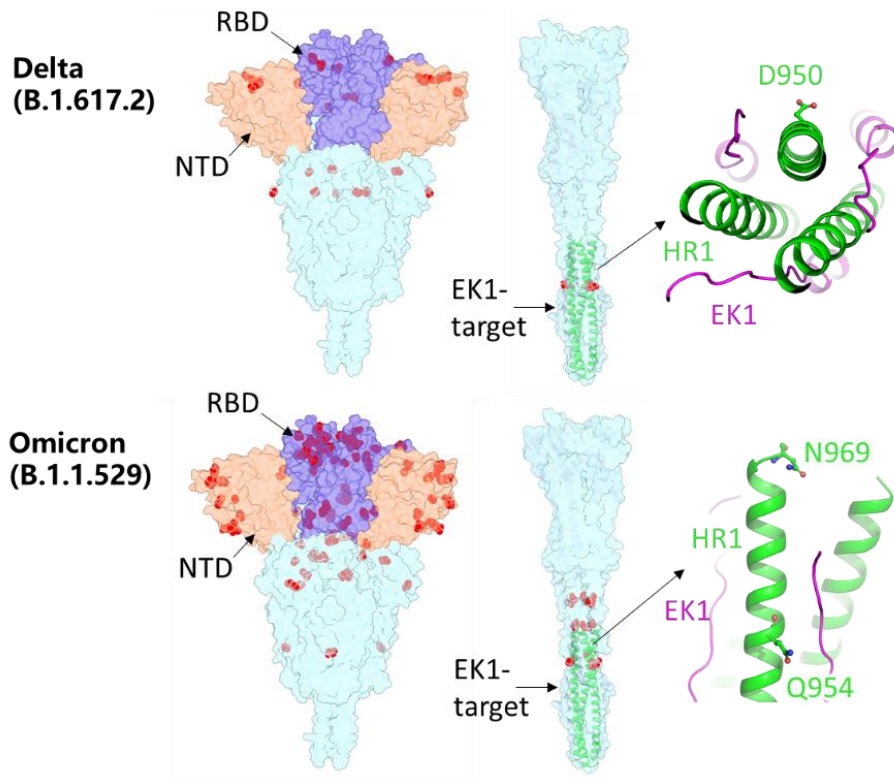

163

164 **Supplementary Fig. S4. The structural comparisons of spike proteins from**  
 165 **different SARS-CoV-2 variants.** The trimer structures of spike protein are shown as  
 166 surface in both prefusion state (PDB entry: 6XR8) and post-fusion state (PDB entry:  
 167 6XRA). The colors for NTD, RBD and rest parts of spike protein are light salmon, slate  
 168 blue and light blue, respectively. The point mutations are shown in red. The complex  
 169 structure of spike HR1 domain (green) and EK1 peptide (magentas) (PDB entry: 7C53)  
 170 are shown as cartoon representative. The point mutations are indicated as sticks.

171
